# Supplementary material
Source: PubMed Central journal article supplement (PMC521134)

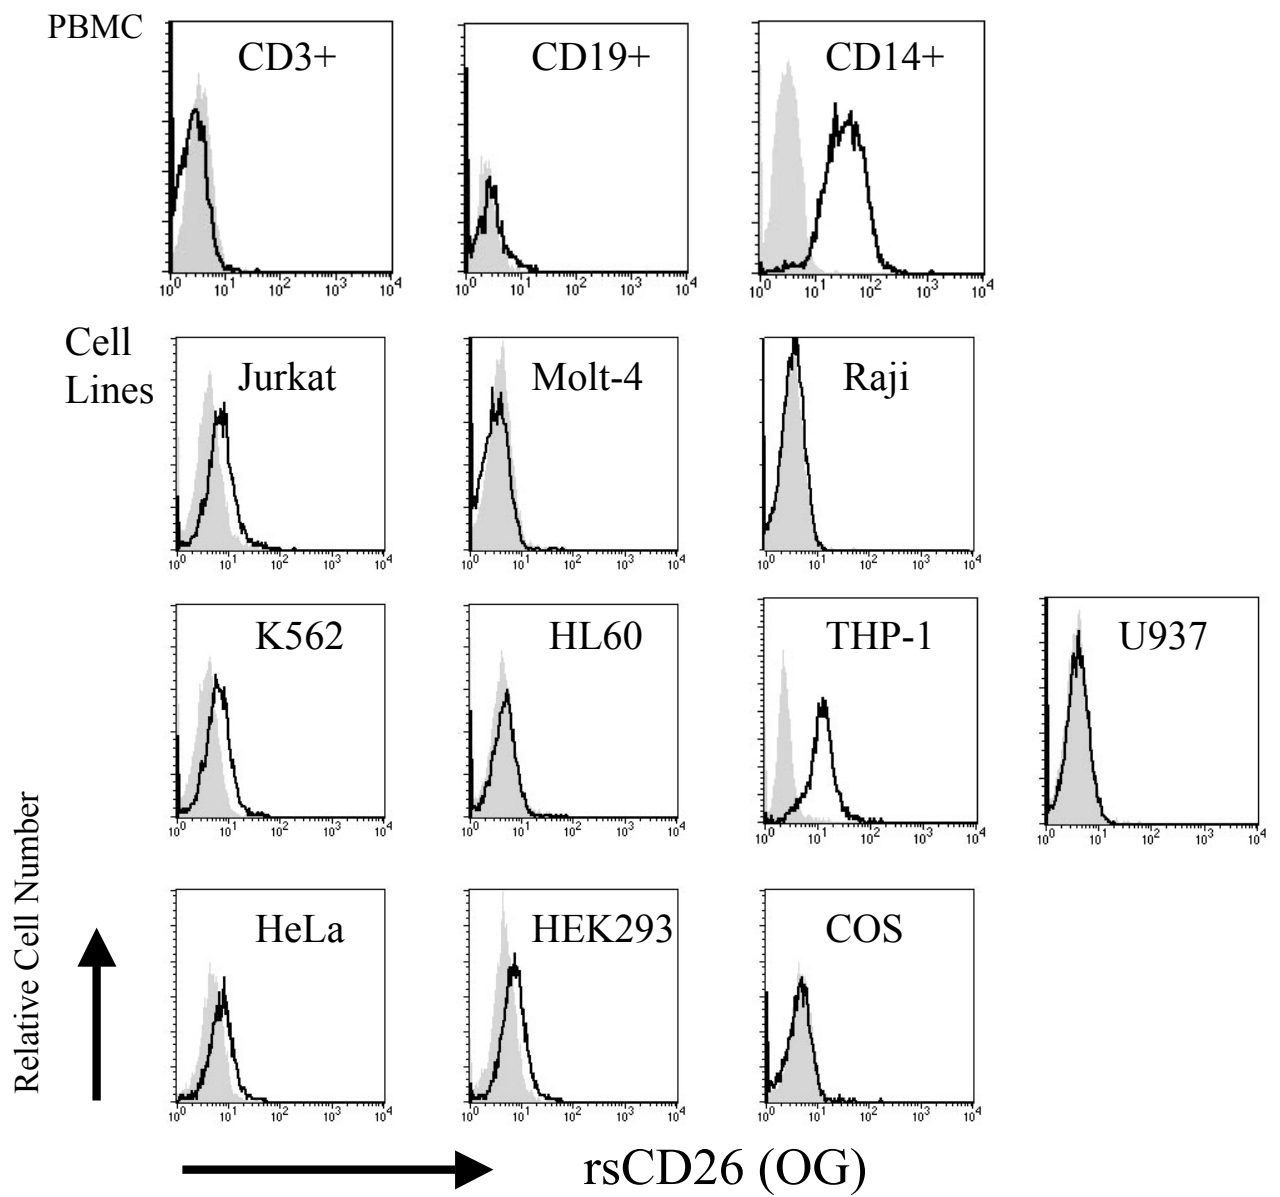

Supplement: pnas_101_39_14186__1.pdf [file pnas_101_39_14186__1.pdf]

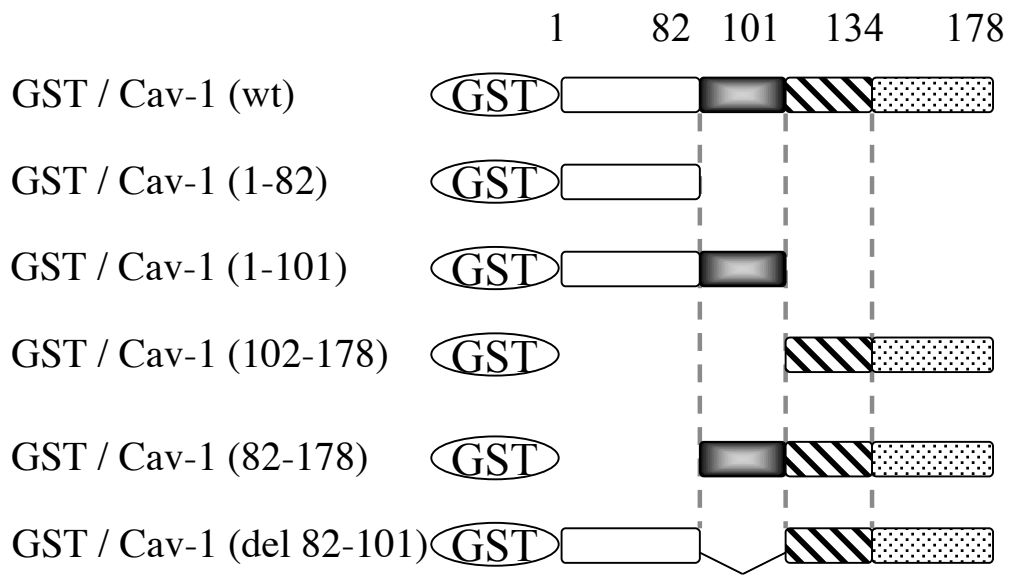

Supplement: pnas_101_39_14186__2.pdf [file pnas_101_39_14186__2.pdf]

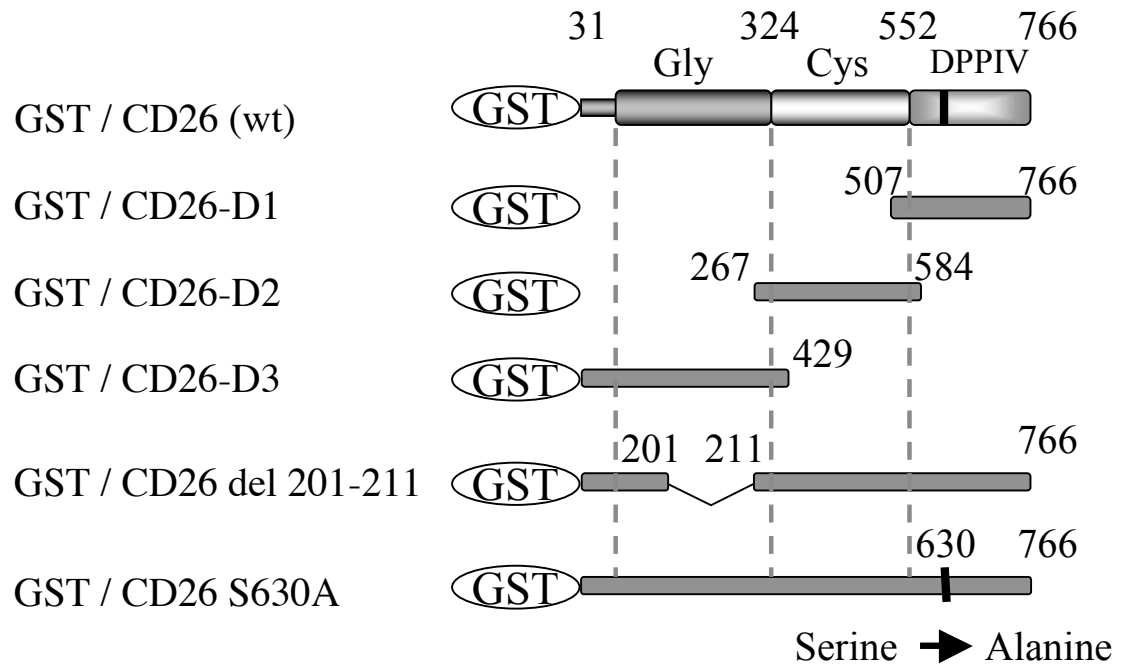

Supplement: pnas_101_39_14186__3.pdf [file pnas_101_39_14186__3.pdf]

**A**

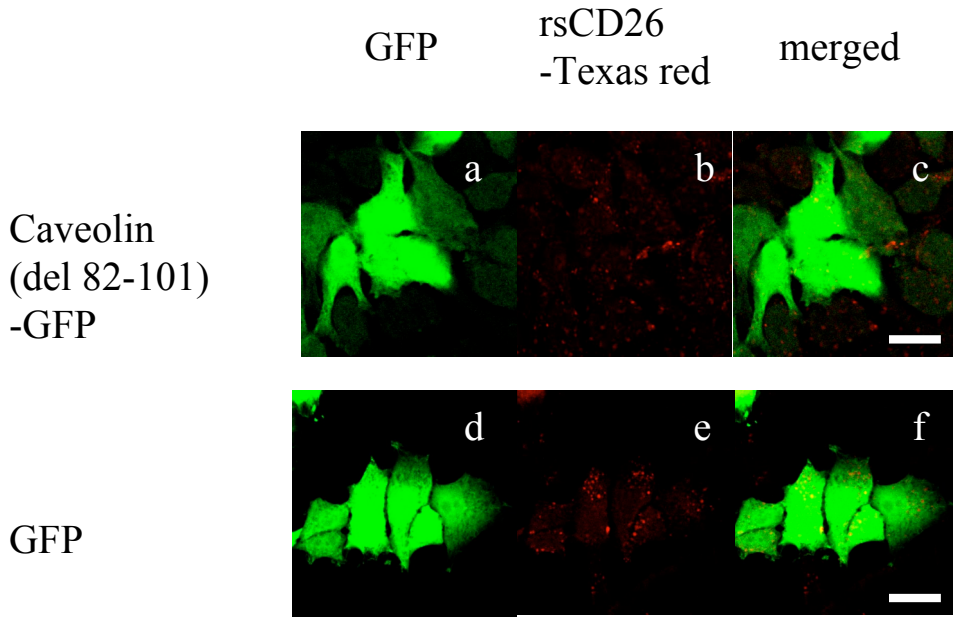

**B**

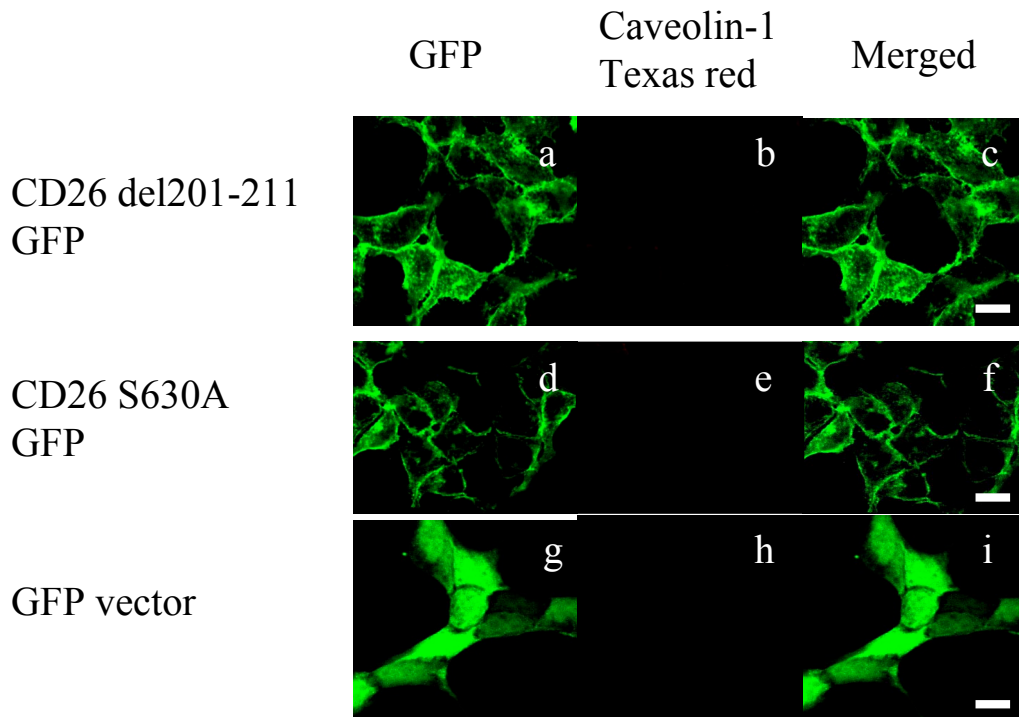

Supplement: pnas_101_39_14186__4.pdf [file pnas_101_39_14186__4.pdf]

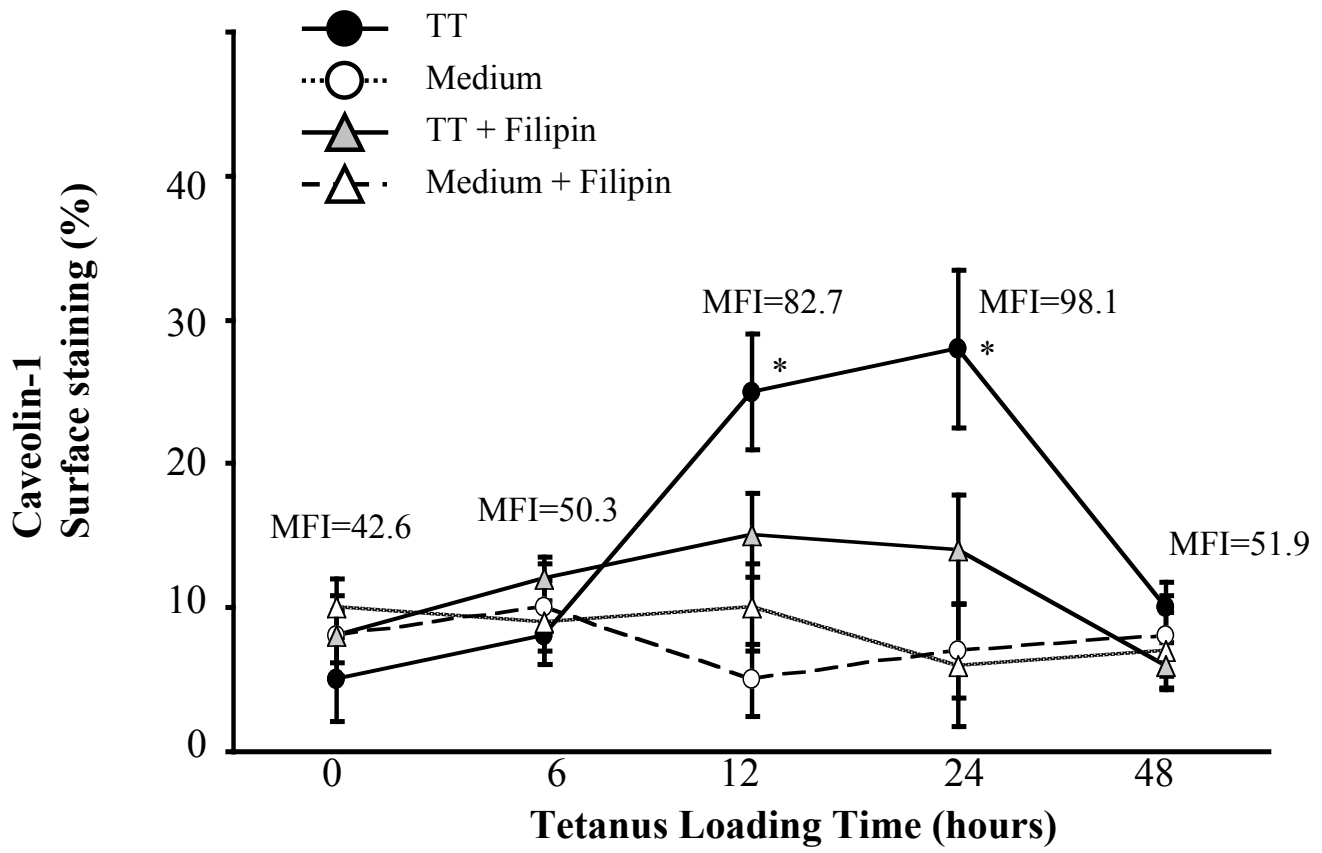

Supplement: pnas_101_39_14186__5.pdf [file pnas_101_39_14186__5.pdf]

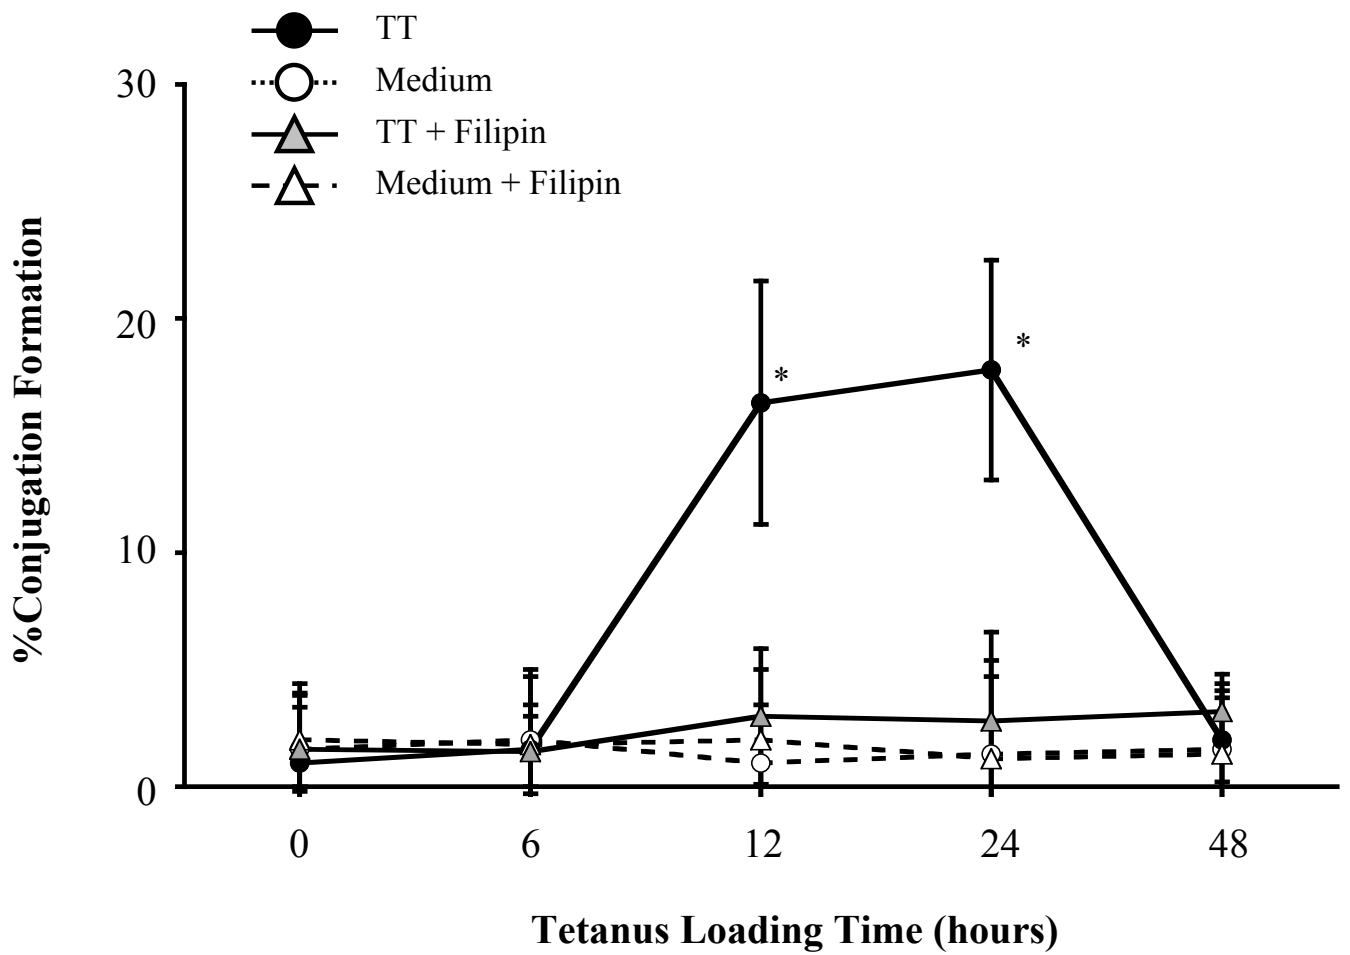

Supplement: pnas_101_39_14186__6.pdf [file pnas_101_39_14186__6.pdf]

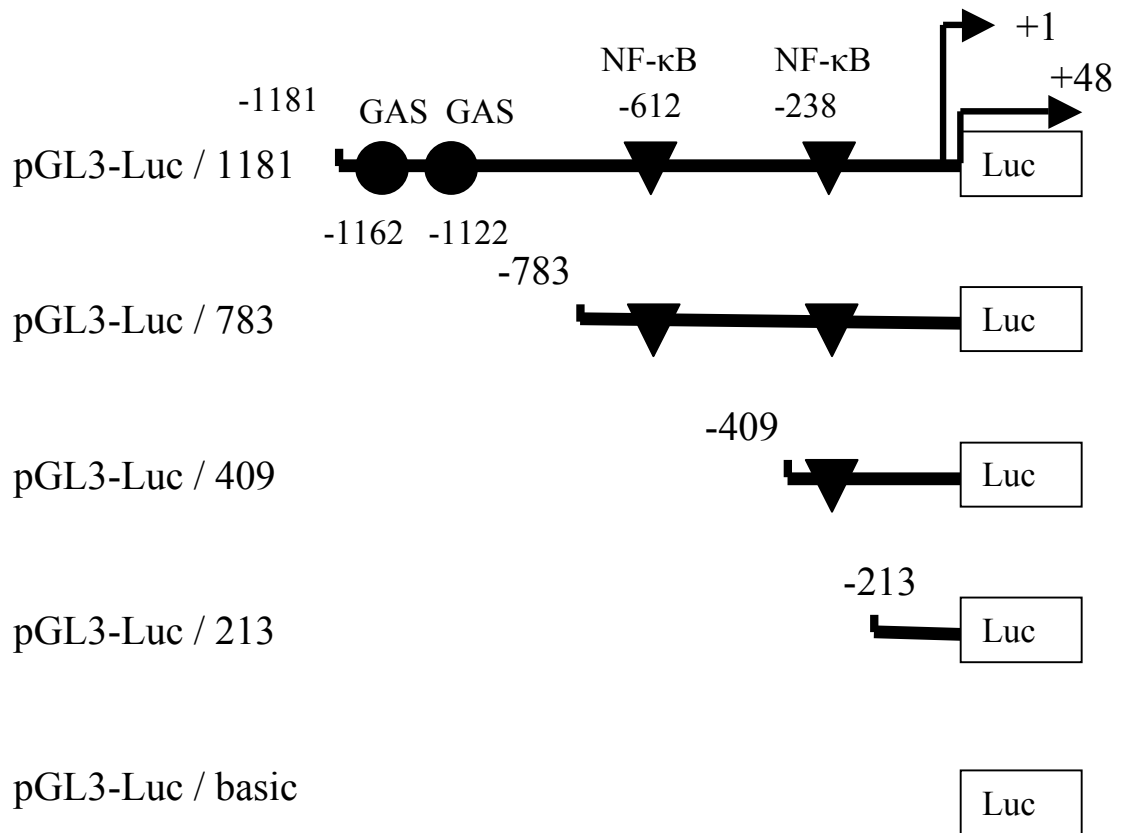

Supplement: pnas_101_39_14186__7.pdf [file pnas_101_39_14186__7.pdf]

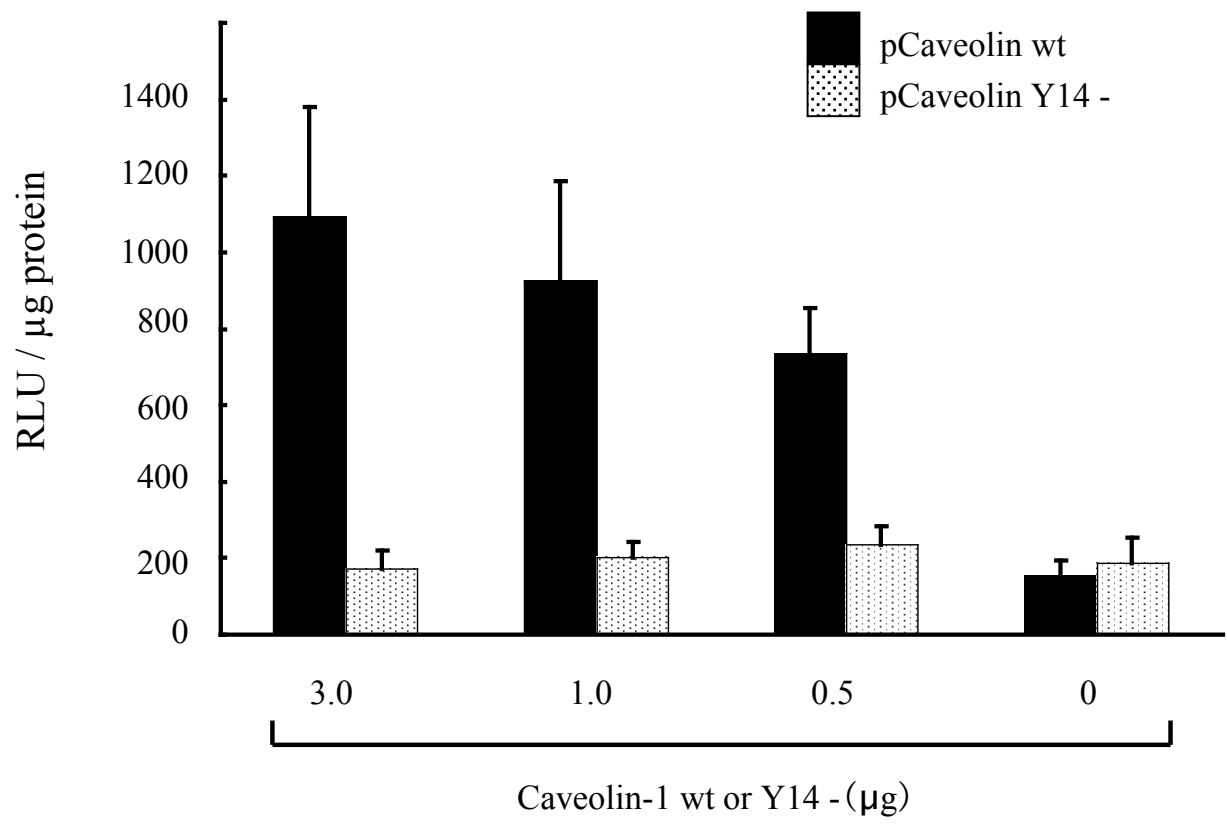

Supplement: pnas_101_39_14186__8.pdf [file pnas_101_39_14186__8.pdf]

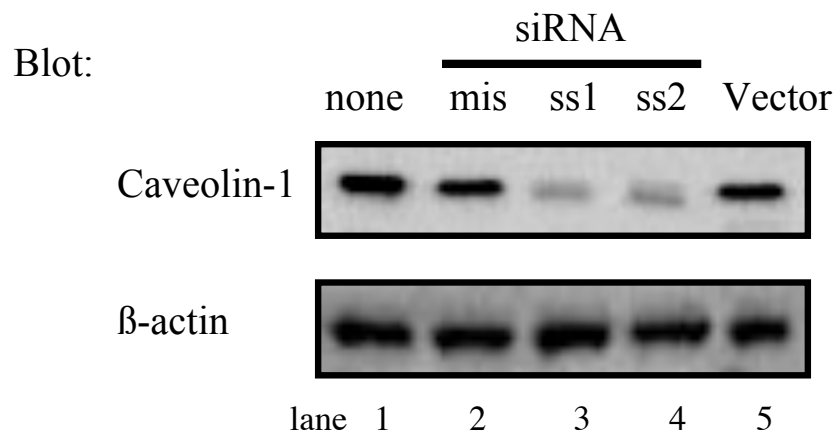

Supplement: pnas_101_39_14186__9.pdf [file pnas_101_39_14186__9.pdf]
